# Supplementary material for: DEK48 Is Required for RNA Editing at Multiple Mitochondrial Sites and Seed Development in Maize
Source: MDPI journal article supplement (doi:10.3390/ijms23063064), 2022-03-12
Supplement: s1 [file s1]

**Primers used in the DEK48 study.**

| Primer name       | Primer sequences (5'-3')    | Application                                                          |
|-------------------|-----------------------------|----------------------------------------------------------------------|
| Dek48-F1          | CCTACACCAGATCGGAAGTCCC      | Genotype <i>dek48-1</i> mutant                                       |
| Dek48-R1          | GCACTCTGGAGATTGTCGCACT      |                                                                      |
| TIR8a             | CGCCTCCATTTTCGTCTGAATCCCCTS |                                                                      |
| TIR8b             | CGCCTCCATTTTCGTCTGAATCCSCTT |                                                                      |
| TIR8c             | SGCCTCCATTTTCGTCTGAATCCCKT  |                                                                      |
| TIR8d             | CGCCTCCATTTTCGTCTGAATCACCTC | Genotype <i>dek48-2</i> mutant                                       |
| Dek48-F2          | CCTCCATGCCTACCTCTCCTG       |                                                                      |
| Dek48-R2          | TCCAAGCCACATTGTTACGGT       | Genotype <i>dek48-3</i> mutant                                       |
| Dek48-F3          | AATGCTGCTGCCCCCTTTGACT      |                                                                      |
| Dek48-R3          | CTCCGAGATTACACACAGCGA       | <i>Dek48</i> cloning into pEntry vector for subcellular localization |
| Dek48-F4          | CACCATGGCGGTGACGCAGGCGTTT   |                                                                      |
| Dek48-R4          | AACCATATCAAGGGCTTCT         | RT-PCR and qRT-PCR analysis of <i>Dek48</i> gene                     |
| Dek48-F5          | GGAACCTACCGCACATTGATC       |                                                                      |
| Dek48-R5          | CAGACAAAGTGAATGTAGTTGCCTC   | <i>Dek48</i> cloning into pUNTF vector for overexpression            |
| Dek48-F6          | TTTTGGATCCATGGCGGTGAC       |                                                                      |
| Dek48-R6          | TTTTCCCGGGTCACCAGTAATC      | Genotype <i>Dek48</i> -OE and <i>Dek48</i> -Com                      |
| Ubi-F             | CTTGATGATGGCATATGCAGC       |                                                                      |
| ZmActin-F1        | TAGTTGAGAATGGCTGACGAGG      | Internal normalization                                               |
| ZmActin-R1        | ATCTTCAGGCGAAACACGGAGC      |                                                                      |
| ZmEF1 $\alpha$ -F | TCTCAAGAACGGTGATGCTG        |                                                                      |
| ZmEF1 $\alpha$ -R | TGGGTCCTTCTTCTCCACAC        |                                                                      |
