# Supplementary material for: DEK48 Is Required for RNA Editing at Multiple Mitochondrial Sites and Seed Development in Maize
Source: MDPI journal article supplement (doi:10.3390/ijms23063064), 2022-03-12
Supplement: s1 [file s1]

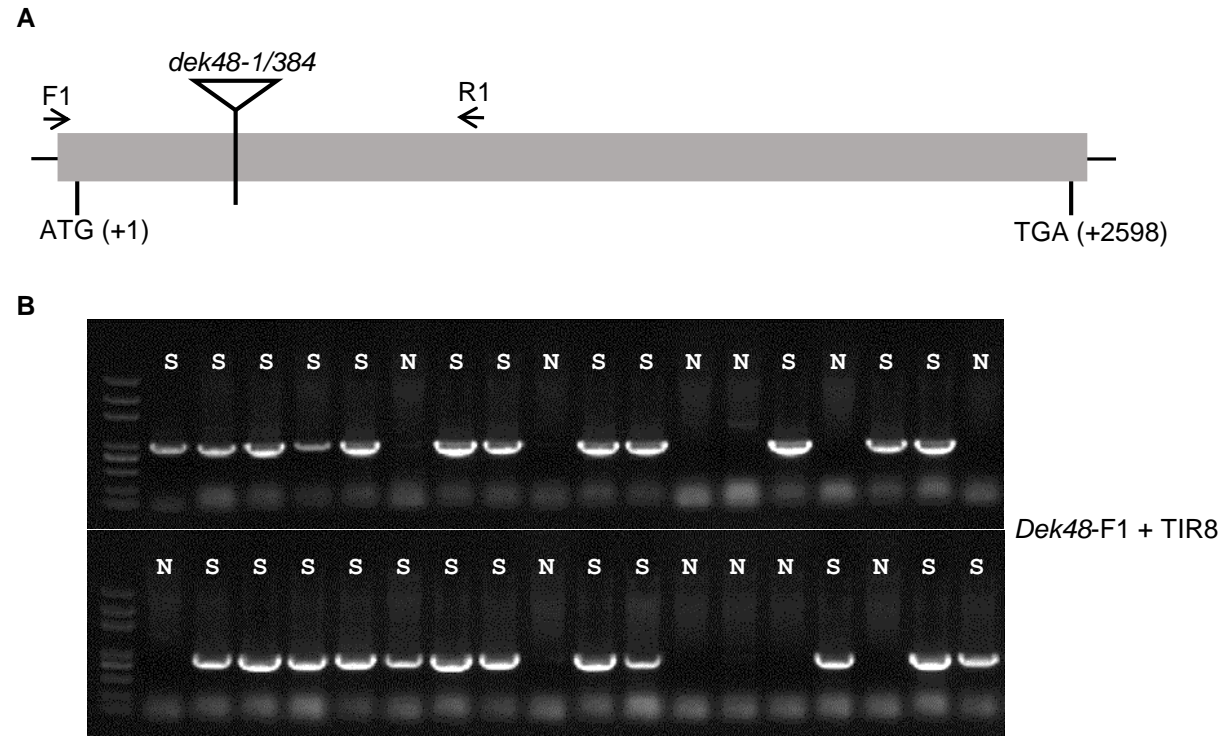

**Figure S1. Linkage analysis of the *dek48-1* mutants.**

(A) Gene structure of *Dek48* and position of *Mu* insertion. The *Mu* insertion is marked by triangle.

(B) Identification of *Mu* insertion in *Dek48-1* by PCR analysis using the gene specific primer

(*Dek48-F1*) and *Mu* TIR8 primer. N: non-segregating (the wild type); S: segregating

(heterozygous). The position of primers is indicated in (A).

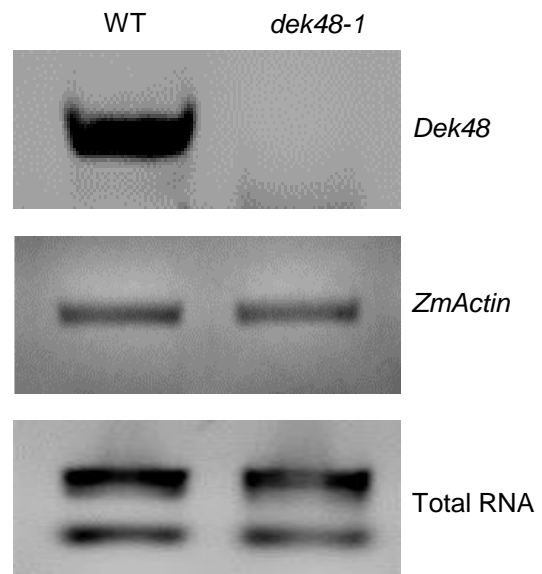

**Figure S2.** Expression detection of *Dek48* in *dek48-1*.

Normalization was performed against *ZmActin* (*GRMZM2G126010*) and total RNA.

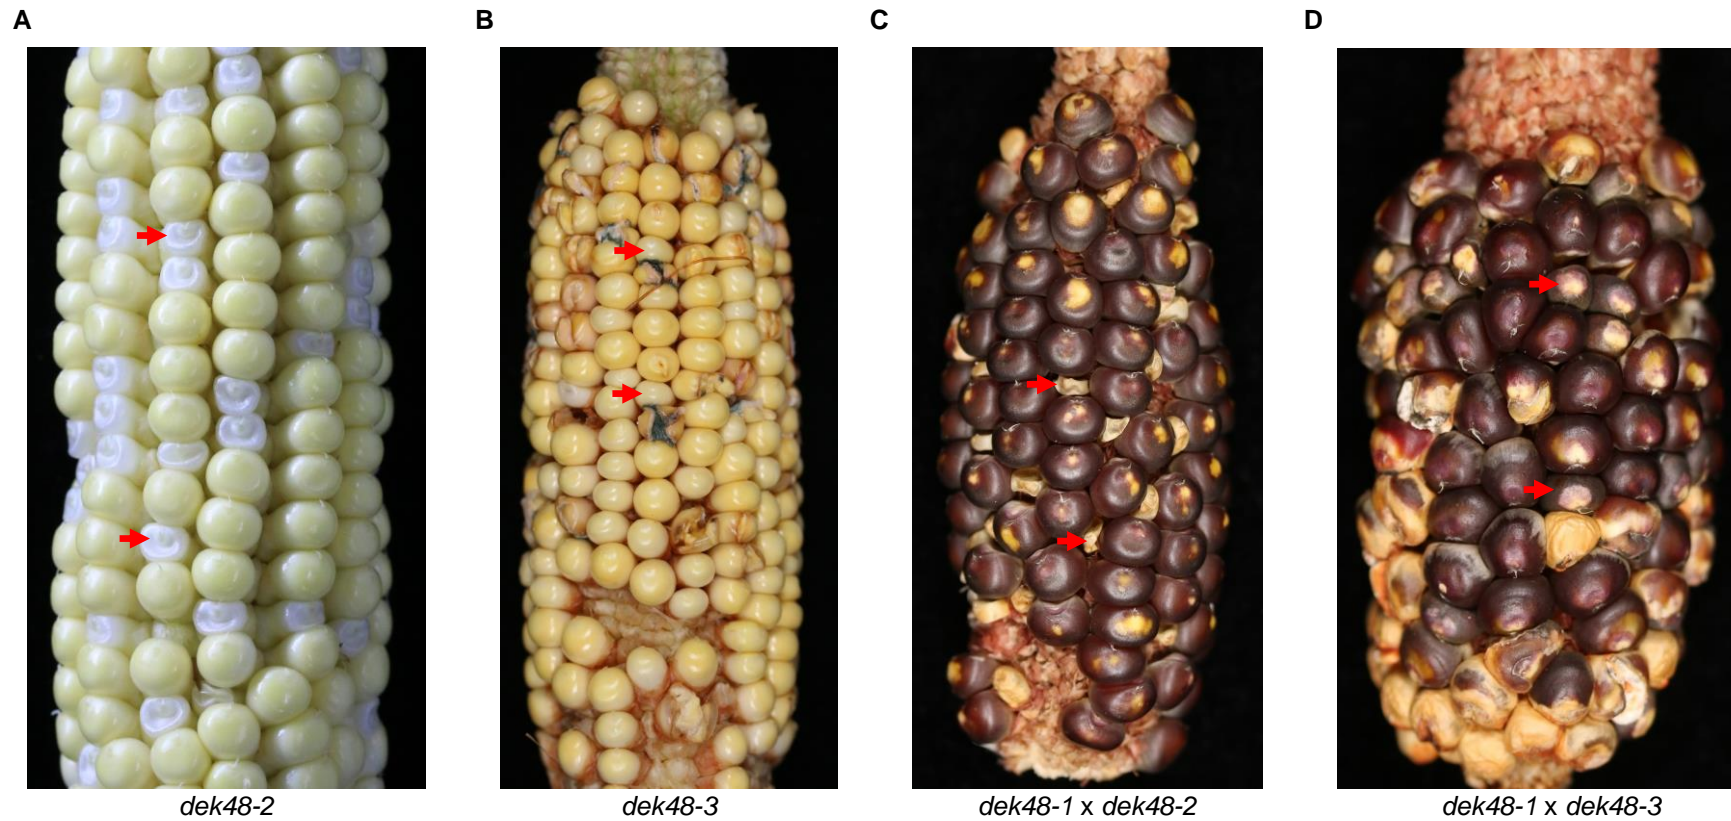

**Figure S3. Phenotypes of the *dek48-2* and *dek48-3* alleles and the cross alleles.**

(A, B) The selfed ear segregates *dek48-2* at 12 DAP (A) and *dek48-3* at 20 DAP (B). The mutant kernels are indicated by arrows.

(C, D) Kernels phenotype of cross progeny of *dek48-1* × *dek48-2* (C) and *dek48-1* × *dek48-3* (D). The mutant kernels are indicated by arrows.

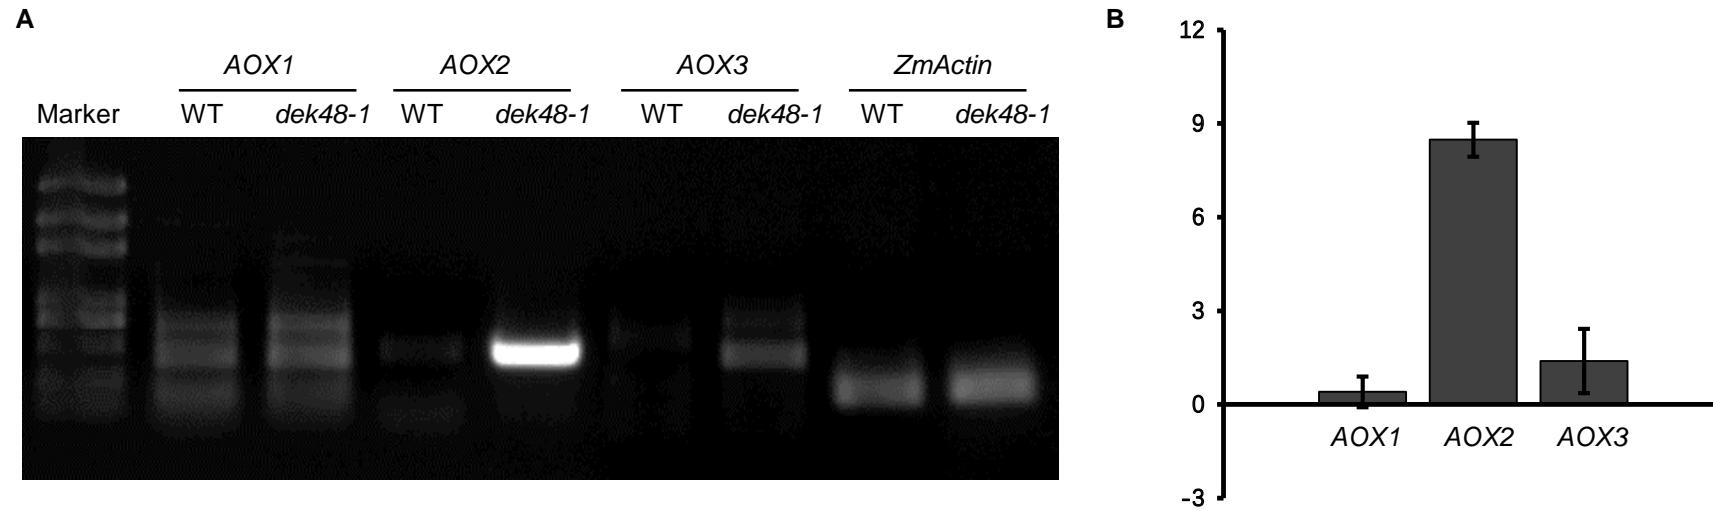

**Figure S4. Expression analysis of AOX genes in *dek48*.**

(A) RT-PCR analysis of AOX1, AOX2, and AOX3 expression in WT and *dek48-1*.

(B) qRT-PCR analysis of AOX1, AOX2, and AOX3 expression in WT and *dek48-1*. Total RNA was extracted from kernels at 12 DAP.

The expression level was normalized against *ZmActin* (*GRMZM2G126010*).
